# Supplementary material
Source: publisher figshare collection journal article supplement (https://future-science-group.figshare.com/articles/dataset/_/21904245)
Supplement: Supplementary file 1 [file 1]

| Supplementary Table 1: Treatment groups studied for a therapeutic effect on a cellular and molecular level. | | | |
| --- | --- | --- | --- |
| Treatment Name | NPs-mediated hyperthermia | Drug | Therapeutic agent used |
| 1. Control | - | - | - |
| 2. Doxorubicin | - | √ | Doxorubicin (85 µg/mL) |
| 3. DoxFol-LSMO NP | - | √ | DoxFol-LSMO (200 µg/mL) |
| 4. Hyperthermia@43 | 43°C | - | Fol-LSMO (200 µg/mL) |
| 5. Combination (Hyperthermia@43+DoxFol-LSMO NP) | 43°C | √ | DoxFol-LSMO (200 µg/mL) |
| 6. Hyperthermia@45 | 45°C | - | Fol-LSMO (200 µg/mL) |

| Supplementary Table 2: Primers used for qPCR | | | | |
| --- | --- | --- | --- | --- |
| Sr. No. | Gene name | Forward primer (5’—3’) | Reverse primer (5’—3’) |  |
| 1 | *GAPDH* | ACAGTTGCCATGTAGACC | TTTTTGGTTGAGCACAGG | [1] |
| 2 | *G6PC* | ACTGTGCATACATGTTCATC | TGAATGTTTTGACCTAGTGC | [1] |
| 3 | *JNK* | TTTGAGAAACTCTTCCCTGATG | ATTGATGTACGGGTGTTGGA | [2] |
| 4 | *Bcl2* | GGCCAGGGTCAGAGTTAAATAG | GGAGAGAATGTTGGCGTCTT | Designed |
| 5 | *Bcl-xl* | GGAAAGCGTAGACAAGGAGATG | CTGGTCATTTCCGACTGAAGAG | Designed |
| 6 | *Survivin* | CAGATTTGAATCGCGGGACCC | CCAAGTCTGGCTCGTTCTCAG | [3] |
| 7 | *p53* | GTTCCGAGAGCTGAATGAGG | TTATGGCGGGAGGTAGACTG | [4] |
| 8 | *Caspase-9* | ACTTTCCCAGGTTTTGTTTCCT | GAAATTAAAGCAACCAGGCATC | [5] |
| 9 | *Caspase-3* | CATACTCCACAGCACCTGGTTA | ACTCAAATTCTGTTGCCACCTT | [5] |
| 10 | *Bax* | GGACGAACTGGACAGTAACATGG | GCAAAGTAGAAAAGGGCGACAAC | [6] |
| 11 | *Bak* | CTCAGAGTTCCAGACCATGTTG | CATGCTGGTAGACGTGTAGGG | [5] |
| 12 | *HIF-1α* | CTCAAAGTCGGACAGCCTCA | CCCTGCAGTAGGTTTCTGCT | [7] |
| 13 | *LC3* | GAGAAGCAGCTTCCTGTTCTGG | GTGTCCGTTCACCAACAGGAAG | [8] |
| 14 | *Beclin1* | CAAGATCCTGGACCGTGTCA | TGGCACTTTCTGTGGACATCA | [8] |
| 15 | *ULK1* | ACAAGAAGAACCTCGCCAAG | TTCCTTCAGGATTTTGATTTCC | [9] |
| 16 | *ULK2* | CTGACTTGTGGAGCATAGG | AATAAGGTGATGTTTCTCTGGG | [9] |
| 17 | *NBR1* | GGTATCCATCAACAGTCAAGG | CGTTTTGCTCCTACAACTGG | [9] |
| 18 | *ATG14* | CAATCGAGGAAGTAAAGACGG | TCGTCCTGAGAGGTAAGTTG | [9] |
| 19 | *ATG7* | TGAGTTGACCCAGAAGAAGCT | CCCAGCAGAGTCACCATTGT | [9] |

| Supplementary Table 3: Loaded folic acid on polymer-coated LSMO nanoparticles by UV-Visible spectroscopy analyzed at 280 nm | | | | | | | | |
| --- | --- | --- | --- | --- | --- | --- | --- | --- |
| Samples | Absorbance at 280 nm | | | Avg | S.E.M. | Folic acid conc.n (µg/mL), on 0.2 mg NP | Avg. conc.n (µg/mL) | S.E.M. |
| FA-PEG-OA-LSMO | 0.937 | 1.246 | 1.011 | 1.065 | 0.09 | 16.883 | 15.71 | 0.59 |
| 0.965 | 1.166 | 0.867 | 0.999 | 0.09 | 15.178 |
| 0.940 | 1.345 | 0.700 | 0.995 | 0.19 | 15.079 |
| FA-PEG-LSMO | 0.694 | 1.000 | 0.428 | 0.707 | 0.17 | 9.064 | 7.97 | 0.62 |
| 0.635 | 0.673 | 0.606 | 0.638 | 0.02 | 7.926 |
| 0.454 | 0.905 | 0.354 | 0.571 | 0.17 | 6.921 |

| Supplementary Table 4: EDC analysis of surface-functionalized LSMO NPs | | | |
| --- | --- | --- | --- |
| Element | Atomic % | | |
| LSMO | PEG-OA-LSMO | FA-PEG-OA-LSMO |
| La | 9.69 | 7.02 | 6.28 |
| Sr | 5.5 | 4.09 | 3.11 |
| Mn | 15.35 | 11.54 | 10.32 |
| O | 69.46 | 43.98 | 45.1 |
| C | - | 33.37 | 26.55 |
| N | - | - | 8.63 |

| Supplementary Table 5: Hydrodynamic size and zeta potential analyses of surface-functionalized LSMO nanoparticles. | | | | | | | |
| --- | --- | --- | --- | --- | --- | --- | --- |
|  | Size by NTA | | Size by DLS | | | | Zeta potential (mV) |
| Sample name | Mode (nm) | SD (nm) | Z avg. (nm) | Peak position (nm) (Intensity) | SD | PDI |
| LSMO | 229 | 91 | 64.97 | Peak 1: 21.4 (96.5%);  Peak 2: 4493 (3.5%) | Peak 1: 127.5;  Peak 2: 888.7 | 0.418 | -22.73 |
| OA-LSMO | - | - |  |  |  |  | 5.02 |
| PEG-OA-LSMO | 34 | 94 | 57.77 | Peak 1: 76.53 (92.2%);  Peak 2: 2924 (6.1%) | Peak 1: 46.62;  Peak 2: 1321 | 0.347 | -14.5 |
| FA-PEG-OA-LSMO | 55 | 50 | 56.41 | Peak 1: 77.77 (97.8%);  Peak 2: 5011 (2.2%) | Peak 1: 52.31;  Peak 2: 604.9 | 0.351 | -12.57 |
| Note: Size analysis of LSMO-OA nanoparticles is not included in the table as it requires a non-aqueous solution for dispersion. Non-aqueous suspension of OA-LSMO NPs restricts the comparison with other NPs, with aqueous suspension. NTA: Nano-sight tracking analysis; DLS: Dynamic light scattering; PDI: Polydispersity index. | | | | | | | |
